# Supplementary material for: Molecular characterization of matrix metalloproteinase gene family across primates
Source: Aging (Albany NY). 2022 Apr 20;14(8):3425–45. doi: 10.18632/aging.204021 (PMC9085222; doi:10.18632/aging.204021)
Supplement: Supplementary Table 1 [file aging-14-204021-s001.xlsx]

## Sheet: Supp Table 1
Supplementary Table 1. List of MMP genes in 11 primate species.
	Callithrix jacchus (marmoset)	Gorilla gorilla (gorilla)	Homo sapiens	Microcebus murinus	Nomascus leucogenys	Pan paniscus	Papio anubis	Pongo abelii	Theropithecus gelada	Rhinopithecus roxellana	Pan troglodytes
MMP-1	ENSCJAG00000014107.2	ENSGGOT00000008912.3	ENSG00000196611.4	ENSMICT00000006293.3	ENSNLET00000009168.2	ENSPPAT00000058821.1	ENSPANT00000004480.2	ENSPPYT00000004537.2	ENSTGET00000019808.1	XP_010377364.1	ENSPTRT00000007870.6
MMP-2	ENSCJAG00000012929.2	ENSGGOT00000060145.1	ENSG00000087245.12	ENSMICT00000003788.3	ENSNLET00000001560.2	ENSPPAT00000057668.1	ENSPANT00000023069.2	ENSPPYT00000008651.2	ENSTGET00000032797.1	XP_010373286.1	ENSPTRT00000092414.1
MMP-3	ENSCJAG00000038052.1	ENSGGOT00000010351.3	ENSG00000149968.11	-	ENSNLET00000009175.2	ENSPPAT00000048938.1	ENSPANT00000004481.2	ENSPPYT00000004538.1	ENSTGET00000019854.1	XP_030773718.1	ENSPTRT00000007868.3
MMP-7	ENSCJAG00000003793.1	-	ENSG00000137673.8	ENSMICT00000002932.3	ENSNLET00000009149.3	ENSPPAT00000043303.1	ENSPANT00000015628.2	ENSPPYT00000004534.2	ENSTGET00000019563.1	XP_010377360.1	ENSPTRT00000007862.4
MMP-8	ENSCJAG00000003743.2	ENSGGOT00000008762.3	ENSG00000118113.11	ENSMICT00000014459.3	ENSNLET00000036504.1	ENSPPAT00000034772.1	ENSPANT00000006268.2	ENSPPYT00000004536.1	ENSTGET00000019706.1	XP_010377372.1	ENSPTRT00000007866.5
MMP-9	ENSCJAG00000017207.2	ENSGGOT00000013624.3	ENSG00000100985.7	ENSMICT00000033023.2	ENSNLET00000008760.3	ENSPPAT00000054070.1	ENSPANT00000020332.2	ENSPPYT00000012870.2	ENSTGET00000027885.1	XP_010382491.2	ENSPTRT00000025282.4
MMP-10	ENSCJAG00000016298.3	ENSGGOT00000023206.2	ENSG00000166670.9	ENSMICT00000006298.3 ENSMICT00000006282.3	ENSNLET00000009170.2	ENSPPAT00000021026.1	ENSPANT00000013497.2	-	ENSTGET00000019762.1	XP_030773717.1	ENSPTRT00000007867.5
MMP-11	ENSCJAG00000010798.2	ENSGGOT00000009113.3	ENSG00000099953.9	ENSMICT00000006762.3	ENSNLET00000000658.3	ENSPPAT00000051302.1	ENSPANT00000029042.2	ENSPPYT00000013502.1	ENSTGET00000041888.1	XP_010368135.2	ENSPTRT00000026441.6
MMP-12	ENSCJAG00000009452.2	ENSGGOT00000033003.2	ENSG00000262406.2	ENSMICT00000006318.3	ENSNLET00000009178.2	ENSPPAT00000008421.1	ENSPANT00000004482.2	-	ENSTGET00000019909.1	XP_010377366.1	-
MMP-13	ENSCJAG00000009477.2	ENSGGOT00000068722.1	ENSG00000137745.11	ENSMICT00000006323.3	ENSNLET00000040789.1	ENSPPAT00000032836.1	ENSPANT00000049745.1	ENSPPYT00000004539.1	ENSTGET00000020025.1	XP_010377368.1	ENSPTRT00000088050.1
MMP-14	ENSCJAG00000008538.3	ENSGGOT00000055131.1	ENSG00000157227.12	ENSMICT00000006201.3	ENSNLET00000018851.3	ENSPPAT00000051256.1	ENSPANT00000006718.2	ENSPPYT00000006671.2	ENSTGET00000026780.1	XP_010376658.1	ENSPTRT00000011266.6
MMP-15	ENSCJAG00000011709.2	ENSGGOT00000030805.2	ENSG00000102996.4	ENSMICT00000017361.3	ENSNLET00000004282.2	ENSPPAT00000059585.1	ENSPANT00000025447.2	ENSPPYT00000008706.2	ENSTGET00000001986.1	XP_010363813.1	ENSPTRT00000015071.5
MMP-16	ENSCJAG00000000239.2	ENSGGOT00000055386.1	ENSG00000156103.15	ENSMICT00000031440.2	ENSNLET00000045369.1	ENSPPAT00000012030.1	ENSPANT00000057539.1	ENSPPYT00000021848.2	ENSTGET00000038044.1	XP_010369997.1	ENSPTRT00000099969.1
MMP-17	ENSCJAG00000003654.2	ENSGGOT00000007427.3	ENSG00000198598.6	ENSMICT00000041942.2 ENSMICT00000047236.2	ENSNLET00000010795.2	ENSPPAT00000036192.1	ENSPANT00000045055.1 ENSPANT00000021613.2	ENSPPYT00000006072.2	ENSTGET00000042095.1	XP_030795770.1	ENSPTRT00000010368.6
MMP-19	ENSCJAG00000007789.2	ENSGGOT00000013279.3 ENSGGOT00000068471.1	ENSG00000123342.15	ENSMICT00000010956.3	ENSNLET00000022431.2 ENSNLET00000041273.1	ENSPPAT00000018066.1 ENSPPAT00000018074.1	ENSPANT00000029134.2 ENSPANT00000040956.1	ENSPPYT00000005487.1	ENSTGET00000018162.1 ENSTGET00000018166.1	XP_010376141.1 XP_010376139.1	ENSPTRT00000009320.5
MMP-20	ENSCJAG00000003781.1	ENSGGOT00000003330.3	ENSG00000137674.3	ENSMICT00000002937.3	ENSNLET00000009150.3	ENSPPAT00000008319.1	ENSPANT00000006266.2	ENSPPYT00000004535.1	ENSTGET00000019600.1	XP_010377361.1	ENSPTRT00000007863.3
MMP-21	ENSCJAG00000012475.2	ENSGGOT00000011456.3	ENSG00000154485.4	ENSMICT00000006183.3	ENSNLET00000000847.2	ENSPPAT00000064828.1	ENSPANT00000027558.2	ENSPPYT00000003321.1	ENSTGET00000042941.1	XP_010356032.2	ENSPTRT00000005789.2
MMP-23B	ENSCJAG00000010920.2	ENSGGOT00000000305.3 ENSGGOT00000043110.1 ENSGGOT00000026123.2	ENSG00000189409.13	ENSMICT00000011032.3	ENSNLET00000001641.3	ENSPPAT00000046421.1	ENSPANT00000005167.2	-	ENSTGET00000017366.1	XP_010350864.1 XP_030797621.1	ENSPTRT00000000071.5
MMP-24	ENSCJAG00000017865.2	ENSGGOT00000012135.3	ENSG00000125966.9	ENSMICT00000051292.2	ENSNLET00000013041.2	ENSPPAT00000034195.1	ENSPANT00000009963.2	ENSPPYT00000012705.2	ENSTGET00000006932.1	XP_030771206.1	ENSPTRT00000024960.5
MMP-25	ENSCJAG00000015476.2	ENSGGOT00000016378.3 ENSGGOT00000016378.3	ENSG00000008516.16	ENSMICT00000030392.2	ENSNLET00000012247.2 ENSNLET00000039668.1	ENSPPAT00000043188.1 ENSPPAT00000043188.1	ENSPANT00000011896.3 ENSPANT00000033891.1	ENSPPYT00000008282.2	ENSTGET00000038215.1	XP_030781408.1	ENSPTRT00000014165.7
MMP-26	ENSCJAG00000015680.2	ENSGGOT00000011304.3	ENSG00000167346.7	ENSMICT00000014298.3	-	ENSPPAT00000027794.1	ENSPANT00000001414.2	ENSPPYT00000004288.1	ENSTGET00000033975.1	XP_010381719.1	ENSPTRT00000006170.3
MMP-27	ENSCJAG00000003769.2	ENSGGOT00000008755.3	ENSG00000137675.4	ENSMICT00000031369.2	ENSNLET00000009154.2	ENSPPAT00000036552.1	ENSPANT00000045145.1	-	ENSTGET00000019675.1	XP_010377362.1	ENSPTRT00000007864.3
MMP-28	ENSCJAG00000014956.2	ENSGGOT00000015671.3	ENSG00000271447.5	ENSMICT00000017052.3	ENSNLET00000017936.2	ENSPPAT00000034870.1	ENSPANT00000045202.1 ENSPANT00000020807.2	ENSPPYT00000009583.2	ENSTGET00000024535.1	XP_030780111.1 XP_010383494.1	ENSPTRT00000045218.3
