# Supplementary material for: Molecular characterization of matrix metalloproteinase gene family across primates
Source: Aging (Albany NY). 2022 Apr 20;14(8):3425–45. doi: 10.18632/aging.204021 (PMC9085222; doi:10.18632/aging.204021)
Supplement: Supplementary Table 2 [file aging-14-204021-s002.xlsx]

## Sheet: Supp Table 2
Supplementary Table 2. Function information of Pfam domains in MMPs, which is extracted from Pfam database.
Pfam	Function
PF00040.18	Fibronectin type II domain is a collagen-binding protein domain.Fibronectin is a multi-domain glycoprotein, found in a soluble form in plasma, and in an insoluble form in loose connective tissue and basement membranes, that binds cell surfaces and various compounds including collagen, fibrin, heparin, DNA, and actin. Fibronectins are involved in a number of important functions e.g., wound healing…
PF00045.18	The hemopexin family is a family of evolutionarily related proteins. Hemopexin-like repeats occur in vitronectin and some matrix metalloproteinases family (matrixins). The HX repeats of some matrixins bind tissue inhibitor of metallopeptidases (TIMPs).Hemopexin (EC 3.2.1.35) is a serum glycoprotein that binds haem and transports it to the liver for breakdown and iron recovery, after which the fre…
PF00413.23	The members of this family are enzymes that cleave peptides. These proteases require zinc for catalysis.
PF01471.17	Peptidoglycan binding domains have a general peptidoglycan binding function and a common core structure consisting of a closed, three-helical bundle with a left-handed twist. It is found at the N or C terminus of a variety of enzymes involved in bacterial cell wall degradation.Examples are: Muramoyl-pentapeptide carboxypeptidase (EC 3.4.17.8); N-acetylmuramoyl-L-alanine amidase cwlA precursor (ce…
PF01549.23	Stichodactyla toxin (ShK, ShkT) is a 35-residue basic peptide from the sea anemone Stichodactyla helianthus that blocks a number of potassium channels. Related peptides form a conserved family of protein domains known as the ShkT domain. Another well-studied toxin of the family is BgK from Bunodosoma granulifera.
PF11857.7	Function unknown
