# Supplementary material for: Molecular characterization of matrix metalloproteinase gene family across primates
Source: Aging (Albany NY). 2022 Apr 20;14(8):3425–45. doi: 10.18632/aging.204021 (PMC9085222; doi:10.18632/aging.204021)
Supplement: Supplementary Table 3 [file aging-14-204021-s003.xlsx]

## Sheet: Supp Table 1
Supplementary Table 1. List of MMP genes in 11 primate species
	Callithrix jacchus (marmoset)	Gorilla gorilla (gorilla)	Homo sapiens	Microcebus murinus	Nomascus leucogenys	Pan paniscus	Papio anubis	Pongo abelii	Theropithecus gelada	Rhinopithecus roxellana	Pan troglodytes
MMP-1	ENSCJAG00000014107.2	ENSGGOT00000008912.3	ENSG00000196611.4	ENSMICT00000006293.3	ENSNLET00000009168.2	ENSPPAT00000058821.1	ENSPANT00000004480.2	ENSPPYT00000004537.2	ENSTGET00000019808.1	XP_010377364.1	ENSPTRT00000007870.6
MMP-2	ENSCJAG00000012929.2	ENSGGOT00000060145.1	ENSG00000087245.12	ENSMICT00000003788.3	ENSNLET00000001560.2	ENSPPAT00000057668.1	ENSPANT00000023069.2	ENSPPYT00000008651.2	ENSTGET00000032797.1	XP_010373286.1	ENSPTRT00000092414.1
MMP-3	ENSCJAG00000038052.1	ENSGGOT00000010351.3	ENSG00000149968.11	-	ENSNLET00000009175.2	ENSPPAT00000048938.1	ENSPANT00000004481.2	ENSPPYT00000004538.1	ENSTGET00000019854.1	XP_030773718.1	ENSPTRT00000007868.3
MMP-7	ENSCJAG00000003793.1	-	ENSG00000137673.8	ENSMICT00000002932.3	ENSNLET00000009149.3	ENSPPAT00000043303.1	ENSPANT00000015628.2	ENSPPYT00000004534.2	ENSTGET00000019563.1	XP_010377360.1	ENSPTRT00000007862.4
MMP-8	ENSCJAG00000003743.2	ENSGGOT00000008762.3	ENSG00000118113.11	ENSMICT00000014459.3	ENSNLET00000036504.1	ENSPPAT00000034772.1	ENSPANT00000006268.2	ENSPPYT00000004536.1	ENSTGET00000019706.1	XP_010377372.1	ENSPTRT00000007866.5
MMP-9	ENSCJAG00000017207.2	ENSGGOT00000013624.3	ENSG00000100985.7	ENSMICT00000033023.2	ENSNLET00000008760.3	ENSPPAT00000054070.1	ENSPANT00000020332.2	ENSPPYT00000012870.2	ENSTGET00000027885.1	XP_010382491.2	ENSPTRT00000025282.4
MMP-10	ENSCJAG00000016298.3	ENSGGOT00000023206.2	ENSG00000166670.9	ENSMICT00000006298.3 ENSMICT00000006282.3	ENSNLET00000009170.2	ENSPPAT00000021026.1	ENSPANT00000013497.2	-	ENSTGET00000019762.1	XP_030773717.1	ENSPTRT00000007867.5
MMP-11	ENSCJAG00000010798.2	ENSGGOT00000009113.3	ENSG00000099953.9	ENSMICT00000006762.3	ENSNLET00000000658.3	ENSPPAT00000051302.1	ENSPANT00000029042.2	ENSPPYT00000013502.1	ENSTGET00000041888.1	XP_010368135.2	ENSPTRT00000026441.6
MMP-12	ENSCJAG00000009452.2	ENSGGOT00000033003.2	ENSG00000262406.2	ENSMICT00000006318.3	ENSNLET00000009178.2	ENSPPAT00000008421.1	ENSPANT00000004482.2	-	ENSTGET00000019909.1	XP_010377366.1	-
MMP-13	ENSCJAG00000009477.2	ENSGGOT00000068722.1	ENSG00000137745.11	ENSMICT00000006323.3	ENSNLET00000040789.1	ENSPPAT00000032836.1	ENSPANT00000049745.1	ENSPPYT00000004539.1	ENSTGET00000020025.1	XP_010377368.1	ENSPTRT00000088050.1
MMP-14	ENSCJAG00000008538.3	ENSGGOT00000055131.1	ENSG00000157227.12	ENSMICT00000006201.3	ENSNLET00000018851.3	ENSPPAT00000051256.1	ENSPANT00000006718.2	ENSPPYT00000006671.2	ENSTGET00000026780.1	XP_010376658.1	ENSPTRT00000011266.6
MMP-15	ENSCJAG00000011709.2	ENSGGOT00000030805.2	ENSG00000102996.4	ENSMICT00000017361.3	ENSNLET00000004282.2	ENSPPAT00000059585.1	ENSPANT00000025447.2	ENSPPYT00000008706.2	ENSTGET00000001986.1	XP_010363813.1	ENSPTRT00000015071.5
MMP-16	ENSCJAG00000000239.2	ENSGGOT00000055386.1	ENSG00000156103.15	ENSMICT00000031440.2	ENSNLET00000045369.1	ENSPPAT00000012030.1	ENSPANT00000057539.1	ENSPPYT00000021848.2	ENSTGET00000038044.1	XP_010369997.1	ENSPTRT00000099969.1
MMP-17	ENSCJAG00000003654.2	ENSGGOT00000007427.3	ENSG00000198598.6	ENSMICT00000041942.2 ENSMICT00000047236.2	ENSNLET00000010795.2	ENSPPAT00000036192.1	ENSPANT00000045055.1 ENSPANT00000021613.2	ENSPPYT00000006072.2	ENSTGET00000042095.1	XP_030795770.1	ENSPTRT00000010368.6
MMP-19	ENSCJAG00000007789.2	ENSGGOT00000013279.3 ENSGGOT00000068471.1	ENSG00000123342.15	ENSMICT00000010956.3	ENSNLET00000022431.2 ENSNLET00000041273.1	ENSPPAT00000018066.1 ENSPPAT00000018074.1	ENSPANT00000029134.2 ENSPANT00000040956.1	ENSPPYT00000005487.1	ENSTGET00000018162.1 ENSTGET00000018166.1	XP_010376141.1 XP_010376139.1	ENSPTRT00000009320.5
MMP-20	ENSCJAG00000003781.1	ENSGGOT00000003330.3	ENSG00000137674.3	ENSMICT00000002937.3	ENSNLET00000009150.3	ENSPPAT00000008319.1	ENSPANT00000006266.2	ENSPPYT00000004535.1	ENSTGET00000019600.1	XP_010377361.1	ENSPTRT00000007863.3
MMP-21	ENSCJAG00000012475.2	ENSGGOT00000011456.3	ENSG00000154485.4	ENSMICT00000006183.3	ENSNLET00000000847.2	ENSPPAT00000064828.1	ENSPANT00000027558.2	ENSPPYT00000003321.1	ENSTGET00000042941.1	XP_010356032.2	ENSPTRT00000005789.2
MMP-23B	ENSCJAG00000010920.2	ENSGGOT00000000305.3 ENSGGOT00000043110.1 ENSGGOT00000026123.2	ENSG00000189409.13	ENSMICT00000011032.3	ENSNLET00000001641.3	ENSPPAT00000046421.1	ENSPANT00000005167.2	-	ENSTGET00000017366.1	XP_010350864.1 XP_030797621.1	ENSPTRT00000000071.5
MMP-24	ENSCJAG00000017865.2	ENSGGOT00000012135.3	ENSG00000125966.9	ENSMICT00000051292.2	ENSNLET00000013041.2	ENSPPAT00000034195.1	ENSPANT00000009963.2	ENSPPYT00000012705.2	ENSTGET00000006932.1	XP_030771206.1	ENSPTRT00000024960.5
MMP-25	ENSCJAG00000015476.2	ENSGGOT00000016378.3 ENSGGOT00000016378.3	ENSG00000008516.16	ENSMICT00000030392.2	ENSNLET00000012247.2 ENSNLET00000039668.1	ENSPPAT00000043188.1 ENSPPAT00000043188.1	ENSPANT00000011896.3 ENSPANT00000033891.1	ENSPPYT00000008282.2	ENSTGET00000038215.1	XP_030781408.1	ENSPTRT00000014165.7
MMP-26	ENSCJAG00000015680.2	ENSGGOT00000011304.3	ENSG00000167346.7	ENSMICT00000014298.3	-	ENSPPAT00000027794.1	ENSPANT00000001414.2	ENSPPYT00000004288.1	ENSTGET00000033975.1	XP_010381719.1	ENSPTRT00000006170.3
MMP-27	ENSCJAG00000003769.2	ENSGGOT00000008755.3	ENSG00000137675.4	ENSMICT00000031369.2	ENSNLET00000009154.2	ENSPPAT00000036552.1	ENSPANT00000045145.1	-	ENSTGET00000019675.1	XP_010377362.1	ENSPTRT00000007864.3
MMP-28	ENSCJAG00000014956.2	ENSGGOT00000015671.3	ENSG00000271447.5	ENSMICT00000017052.3	ENSNLET00000017936.2	ENSPPAT00000034870.1	ENSPANT00000045202.1 ENSPANT00000020807.2	ENSPPYT00000009583.2	ENSTGET00000024535.1	XP_030780111.1 XP_010383494.1	ENSPTRT00000045218.3

## Sheet: Supp Table 2
Supplementary Table 2. Function information of Pfam domains in MMPs, which is extracted from Pfam Database
Pfam	Function
PF00040.18	Fibronectin type II domain is a collagen-binding protein domain.Fibronectin is a multi-domain glycoprotein, found in a soluble form in plasma, and in an insoluble form in loose connective tissue and basement membranes, that binds cell surfaces and various compounds including collagen, fibrin, heparin, DNA, and actin. Fibronectins are involved in a number of important functions e.g., wound healing…
PF00045.18	The hemopexin family is a family of evolutionarily related proteins. Hemopexin-like repeats occur in vitronectin and some matrix metalloproteinases family (matrixins). The HX repeats of some matrixins bind tissue inhibitor of metallopeptidases (TIMPs).Hemopexin (EC 3.2.1.35) is a serum glycoprotein that binds haem and transports it to the liver for breakdown and iron recovery, after which the fre…
PF00413.23	The members of this family are enzymes that cleave peptides. These proteases require zinc for catalysis.
PF01471.17	Peptidoglycan binding domains have a general peptidoglycan binding function and a common core structure consisting of a closed, three-helical bundle with a left-handed twist. It is found at the N or C terminus of a variety of enzymes involved in bacterial cell wall degradation.Examples are: Muramoyl-pentapeptide carboxypeptidase (EC 3.4.17.8); N-acetylmuramoyl-L-alanine amidase cwlA precursor (ce…
PF01549.23	Stichodactyla toxin (ShK, ShkT) is a 35-residue basic peptide from the sea anemone Stichodactyla helianthus that blocks a number of potassium channels. Related peptides form a conserved family of protein domains known as the ShkT domain. Another well-studied toxin of the family is BgK from Bunodosoma granulifera.
PF11857.7	Function unknown

## Sheet: Supp Table 3
Supplementary Table 3. Signal peptides and Pfam domains in primate MMPs.
		signal peptide	PF01471.17	PF00413.23	PF00045.18
MMP-1	Mmu__ENSMICT00000006293.3	yes	yes	yes	yes
	Cja__ENSCJAG00000014107.2	yes	yes	yes	yes
	Nle__ENSNLET00000009168.2	yes	yes	yes	yes
	Pab__ENSPPYT00000004537.2	yes	yes	yes	yes
	Ggo__ENSGGOT00000008912.3	yes	yes	yes	yes
	Hsa__ENSG00000196611.4	yes	yes	yes	yes
	Ptr__ENSPTRT00000007870.6	yes	yes	yes	yes
	Ppa__ENSPPAT00000058821.1	yes	yes	yes	yes
	Rro__XP_010377364.1	yes	yes	yes	yes
	Tge__ENSTGET00000019808.1	yes	yes	yes	yes
	Pan__ENSPANT00000004480.2	yes	yes	yes	yes
		signal peptide	PF01471.17	PF00413.23	PF00045.18	PF00040.18
MMP-2	Cja__ENSCJAG00000012929.2	yes	yes	yes	yes	yes
	Mmu__ENSMICT00000003788.3	no	yes	yes	yes	yes
	Nle__ENSNLET00000001560.2	yes	yes	yes	yes	yes
	Pan__ENSPANT00000023069.2	yes	yes	yes	yes	yes
	Tge__ENSTGET00000032797.1	yes	yes	yes	yes	yes
	Rro__XP_010373286.1	yes	yes	yes	yes	yes
	Ppa__ENSPPAT00000057668.1	yes	yes	yes	yes	yes
	Pab__ENSPPYT00000008651.2	yes	yes	yes	yes	yes
	Hsa__ENSG00000087245.12	yes	yes	yes	yes	yes
	Ptr__ENSPTRT00000092414.1	yes	yes	yes	yes	yes
	Ggo__ENSGGOT00000060145.1	no	yes	yes	yes	yes
		signal peptide	PF01471.17	PF00413.23	PF00045.18
MMP-3	Cja__ENSCJAG00000038052.1	yes	yes	yes	yes
	Nle__ENSNLET00000009175.2	yes	yes	yes	yes
	Pab__ENSPPYT00000004538.1	yes	yes	yes	yes
	Ppa__ENSPPAT00000048938.1	yes	yes	yes	yes
	Ptr__ENSPTRT00000007868.3	yes	yes	yes	yes
	Hsa__ENSG00000149968.11	yes	yes	yes	yes
	Ggo__ENSGGOT00000010351.3	yes	yes	yes	yes
	Rro__XP_030773718.1	yes	yes	yes	yes
	Tge__ENSTGET00000019854.1	yes	yes	yes	yes
	Pan__ENSPANT00000004481.2	yes	yes	yes	yes
		signal peptide	PF01471.17	PF00413.23
MMP-7	Nle__ENSNLET00000009149.3	yes	yes	yes
	Pab__ENSPPYT00000004534.2	yes	yes	yes
	Cja__ENSCJAG00000003793.1	yes	yes	yes
	Mmu__ENSMICT00000002932.3	yes	yes	yes
	Rro__XP_010377360.1	yes	yes	yes
	Tge__ENSTGET00000019563.1	yes	yes	yes
	Pan__ENSPANT00000015628.2	yes	yes	yes
	Hsa__ENSG00000137673.8	yes	yes	yes
	Ppa__ENSPPAT00000043303.1	yes	yes	yes
	Ptr__ENSPTRT00000007862.4	yes	yes	yes
		signal peptide	PF01471.17	PF00413.23	PF00045.18
MM-8	Mmu__ENSMICT00000014459.3	yes	yes	yes	yes
	Cja__ENSCJAG00000003743.2	yes	yes	yes	yes
	Nle__ENSNLET00000036504.1	yes	no	yes	yes
	Pab__ENSPPYT00000004536.1	yes	yes	yes	yes
	Ggo__ENSGGOT00000008762.3	yes	yes	yes	yes
	Hsa__ENSG00000118113.11	yes	yes	yes	yes
	Ptr__ENSPTRT00000007866.5	yes	yes	yes	yes
	Ppa__ENSPPAT00000034772.1	yes	yes	yes	yes
	Rro__XP_010377372.1	yes	yes	yes	yes
	Pan__ENSPANT00000006268.2	yes	yes	yes	yes
	Tge__ENSTGET00000019706.1	yes	yes	yes	yes
		signal peptide	PF01471.17	PF00413.23	PF00045.18	PF00040.18
MMP-9	Mmu__ENSMICT00000033023.2	yes	yes	yes	yes	yes
	Cja__ENSCJAG00000017207.2	yes	yes	yes	yes	yes
	Rro__XP_010382491.2	yes	yes	yes	yes	yes
	Tge__ENSTGET00000027885.1	yes	yes	yes	yes	yes
	Pan__ENSPANT00000020332.2	yes	yes	yes	yes	yes
	Pab__ENSPPYT00000012870.2	yes	yes	yes	yes	yes
	Nle__ENSNLET00000008760.3	yes	yes	yes	yes	yes
	Hsa__ENSG00000100985.7	yes	yes	yes	yes	yes
	Ggo__ENSGGOT00000013624.3	yes	yes	yes	yes	yes
	Ptr__ENSPTRT00000025282.4	yes	yes	yes	yes	yes
	Ppa__ENSPPAT00000054070.1	yes	yes	yes	yes	yes
		signal peptide	PF01471.17	PF00413.23	PF00045.18
MMP-10	Tge__ENSTGET00000019762.1	yes	yes	yes	yes
	Mmu__ENSMICT00000006298.3	yes	yes	yes	yes
	Mmu__ENSMICT00000006282.3	yes	yes	yes	yes
	Cja__ENSCJAG00000016298.3	yes	yes	yes	yes
	Nle__ENSNLET00000009170.2	yes	yes	yes	yes
	Ggo__ENSGGOT00000023206.2	yes	yes	yes	yes
	Hsa__ENSG00000166670.9	yes	yes	yes	yes
	Ptr__ENSPTRT00000007867.5	yes	yes	yes	yes
	Ppa__ENSPPAT00000021026.1	yes	yes	yes	yes
	Rro__XP_030773717.1	no	no	yes	yes
	Pan__ENSPANT00000013497.2	yes	yes	yes	yes
		signal peptide	PF00413.23	PF00045.18
MMP-11	Mmu__ENSMICT00000006762.3	yes	yes	yes
	Cja__ENSCJAG00000010798.2	no	yes	yes
	Rro__XP_010368135.2	yes	yes	yes
	Pan__ENSPANT00000029042.2	yes	yes	yes
	Tge__ENSTGET00000041888.1	yes	yes	yes
	Pab__ENSPPYT00000013502.1	no	yes	yes
	Nle__ENSNLET00000000658.3	yes	yes	yes
	Ggo__ENSGGOT00000009113.3	yes	yes	yes
	Hsa__ENSG00000099953.9	yes	yes	yes
	Ptr__ENSPTRT00000026441.6	yes	yes	yes
	Ppa__ENSPPAT00000051302.1	no	yes	yes
		signal peptide	PF01471.17	PF00413.23	PF00045.18
MMP-12	Mmu__ENSMICT00000006318.3	yes	yes	yes	yes
	Cja__ENSCJAG00000009452.2	yes	yes	yes	yes
	Nle__ENSNLET00000009178.2	yes	yes	yes	yes
	Ppa__ENSPPAT00000008421.1	yes	yes	yes	yes
	Hsa__ENSG00000262406.2	yes	yes	yes	yes
	Ggo__ENSGGOT00000033003.2	yes	yes	yes	yes
	Rro__XP_010377366.1	yes	yes	yes	yes
	Pan__ENSPANT00000004482.2	yes	yes	yes	yes
	Tge__ENSTGET00000019909.1	yes	yes	yes	yes
		signal peptide	PF01471.17	PF00413.23	PF00045.18
MMP-13	Mmu__ENSMICT00000006323.3	yes	yes	yes	yes
	Cja__ENSCJAG00000009477.2	yes	yes	yes	yes
	Pab__ENSPPYT00000004539.1	yes	yes	yes	yes
	Nle__ENSNLET00000040789.1	yes	yes	yes	yes
	Ptr__ENSPTRT00000088050.1	yes	yes	yes	yes
	Hsa__ENSG00000137745.11	yes	yes	yes	yes
	Ggo__ENSGGOT00000068722.1	yes	yes	yes	yes
	Ppa__ENSPPAT00000032836.1	yes	yes	yes	yes
	Rro__XP_010377368.1	yes	yes	yes	yes
	Tge__ENSTGET00000020025.1	yes	yes	yes	yes
	Pan__ENSPANT00000049745.1	yes	yes	yes	yes
		signal peptide	PF01471.17	PF00413.23	PF00045.18	PF11857.7
MMP-14	Cja__ENSCJAG00000008538.3	yes	yes	yes	yes	yes
	Mmu__ENSMICT00000006201.3	yes	yes	yes	yes	yes
	Rro__XP_010376658.1	yes	yes	yes	yes	yes
	Nle__ENSNLET00000018851.3	yes	yes	yes	yes	yes
	Pan__ENSPANT00000006718.2	yes	yes	yes	yes	yes
	Tge__ENSTGET00000026780.1	yes	yes	yes	yes	yes
	Pab__ENSPPYT00000006671.2	yes	yes	yes	yes	yes
	Hsa__ENSG00000157227.12	yes	yes	yes	yes	yes
	Ptr__ENSPTRT00000011266.6	yes	yes	yes	yes	yes
	Ggo__ENSGGOT00000055131.1	yes	yes	yes	yes	yes
	Ppa__ENSPPAT00000051256.1	yes	yes	yes	yes	yes
		signal peptide	PF01471.17	PF00413.23	PF00045.18	PF11857.7
MMP-15	Mmu__ENSMICT00000017361.3	yes	yes	yes	yes	yes
	Cja__ENSCJAG00000011709.2	yes	yes	yes	yes	yes
	Nle__ENSNLET00000004282.2	yes	yes	yes	yes	yes
	Ppa__ENSPPAT00000059585.1	yes	yes	yes	yes	yes
	Ptr__ENSPTRT00000015071.5	yes	yes	yes	yes	yes
	Hsa__ENSG00000102996.4	yes	yes	yes	yes	yes
	Pab__ENSPPYT00000008706.2	yes	yes	yes	yes	yes
	Ggo__ENSGGOT00000030805.2	yes	yes	yes	yes	yes
	Rro__XP_010363813.1	yes	yes	yes	yes	yes
	Pan__ENSPANT00000025447.2	yes	yes	yes	yes	yes
	Tge__ENSTGET00000001986.1	yes	yes	yes	yes	yes
		signal peptide	PF01471.17	PF00413.23	PF00045.18	PF11857.7
MMP-16	Nle__ENSNLET00000045369.1	no	yes	yes	yes	yes
	Pab__ENSPPYT00000021848.2	no	yes	yes	yes	yes
	Ppa__ENSPPAT00000012030.1	no	yes	yes	yes	yes
	Mmu__ENSMICT00000031440.2	no	yes	yes	yes	yes
	Rro__XP_010369997.1	no	yes	yes	yes	yes
	Ptr__ENSPTRT00000099969.1	no	yes	yes	yes	yes
	Pan__ENSPANT00000057539.1	no	yes	yes	yes	yes
	Hsa__ENSG00000156103.15	no	yes	yes	yes	yes
	Ggo__ENSGGOT00000055386.1	no	yes	yes	yes	yes
	Tge__ENSTGET00000038044.1	no	yes	yes	yes	yes
	Cja__ENSCJAG00000000239.2	no	yes	yes	yes	yes
		signal peptide	PF01471.17	PF00413.23	PF00045.18
MMP-17	Mmu__ENSMICT00000041942.2	no	yes	yes	yes
	Mmu__ENSMICT00000047236.2	no	yes	yes	yes
	Nle__ENSNLET00000010795.2	yes	yes	yes	yes
	Pab__ENSPPYT00000006072.2	no	yes	yes	yes
	Cja__ENSCJAG00000003654.2	no	yes	yes	yes
	Rro__XP_030795770.1	yes	yes	yes	yes
	Pan__ENSPANT00000045055.1	yes	yes	yes	yes
	Tge__ENSTGET00000042095.1	yes	yes	yes	yes
	Pan__ENSPANT00000021613.2	yes	yes	yes	yes
	Ppa__ENSPPAT00000036192.1	no	yes	yes	yes
	Ptr__ENSPTRT00000010368.6	yes	yes	yes	yes
	Ggo__ENSGGOT00000007427.3	yes	yes	yes	yes
	Hsa__ENSG00000198598.6	yes	yes	yes	yes
		signal peptide	PF01471.17	PF00413.23	PF00045.18
MMP-19	Cja__ENSCJAG00000007789.2	no	yes	yes	yes
	Nle__ENSNLET00000022431.2	yes	yes	yes	yes
	Pab__ENSPPYT00000005487.1	yes	yes	yes	yes
	Mmu__ENSMICT00000010956.3	yes	yes	yes	yes
	Hsa__ENSG00000123342.15	yes	yes	yes	yes
	Ggo__ENSGGOT00000013279.3	yes	yes	yes	yes
	Ptr__ENSPTRT00000009320.5	yes	yes	yes	yes
	Ppa__ENSPPAT00000018066.1	yes	yes	yes	yes
	Tge__ENSTGET00000018162.1	yes	yes	yes	yes
	Pan__ENSPANT00000029134.2	yes	yes	yes	yes
	Rro__XP_010376139.1	yes	yes	yes	yes
	Rro__XP_010376141.1	yes	yes	yes	no
	Nle__ENSNLET00000041273.1	yes	yes	yes	no
	Ggo__ENSGGOT00000068471.1	yes	yes	yes	no
	Ppa__ENSPPAT00000018074.1	yes	yes	yes	no
	Pan__ENSPANT00000040956.1	yes	yes	yes	no
	Tge__ENSTGET00000018166.1	yes	yes	yes	no
		signal peptide	PF01471.17	PF00413.23	PF00045.18
MMP-20	Mmu__ENSMICT00000002937.3	yes	yes	yes	yes
	Cja__ENSCJAG00000003781.1	yes	yes	yes	yes
	Nle__ENSNLET00000009150.3	yes	yes	yes	yes
	Pab__ENSPPYT00000004535.1	yes	yes	yes	yes
	Ggo__ENSGGOT00000003330.3	yes	yes	yes	yes
	Hsa__ENSG00000137674.3	yes	yes	yes	yes
	Ptr__ENSPTRT00000007863.3	yes	yes	yes	yes
	Ppa__ENSPPAT00000008319.1	yes	yes	yes	yes
	Rro__XP_010377361.1	yes	yes	yes	yes
	Pan__ENSPANT00000006266.2	yes	yes	yes	yes
	Tge__ENSTGET00000019600.1	yes	yes	yes	yes
		signal peptide	PF01471.17	PF00413.23	PF00045.18
MMP-21	Cja__ENSCJAG00000012475.2	yes	yes	yes	yes
	Mmu__ENSMICT00000006183.3	yes	yes	yes	yes
	Pab__ENSPPYT00000003321.1	yes	yes	yes	yes
	Nle__ENSNLET00000000847.2	yes	yes	yes	yes
	Ggo__ENSGGOT00000011456.3	yes	yes	yes	yes
	Ptr__ENSPTRT00000005789.2	yes	yes	yes	yes
	Hsa__ENSG00000154485.4	yes	yes	yes	yes
	Ppa__ENSPPAT00000064828.1	yes	yes	yes	yes
	Rro__XP_010356032.2	yes	yes	yes	yes
	Pan__ENSPANT00000027558.2	yes	yes	yes	yes
	Tge__ENSTGET00000042941.1	yes	yes	yes	yes
		signal peptide	PF00413.23	PF01549.23	PF13895.5
MMP-23B	Ppa__ENSPPAT00000046421.1	no	yes	yes	no
	Hsa__ENSG00000189409.13	no	yes	yes	yes
	Ggo__ENSGGOT00000000305.3	no	yes	yes	yes
	Ptr__ENSPTRT00000000071.5	no	yes	yes	yes
	Ggo__ENSGGOT00000043110.1	no	yes	yes	yes
	Ggo__ENSGGOT00000026123.2	no	yes	yes	yes
	Cja__ENSCJAG00000010920.2	no	yes	yes	yes
	Mmu__ENSMICT00000011032.3	no	yes	yes	no
	Nle__ENSNLET00000001641.3	no	yes	yes	yes
	Rro__XP_010350864.1	no	yes	yes	yes
	Pan__ENSPANT00000005167.2	no	yes	yes	yes
	Tge__ENSTGET00000017366.1	no	yes	yes	yes
	Rro__XP_030797621.1	no	yes	yes	yes
		signal peptide	PF01471.17	PF00413.23	PF00045.18	PF11857.7
MMP-24	Hsa__ENSG00000125966.9	yes	yes	yes	yes	yes
	Ptr__ENSPTRT00000024960.5	yes	yes	yes	yes	yes
	Rro__XP_030771206.1	no	yes	yes	yes	yes
	Cja__ENSCJAG00000017865.2	no	yes	yes	yes	yes
	Tge__ENSTGET00000006932.1	no	yes	yes	yes	yes
	Pan__ENSPANT00000009963.2	no	yes	yes	yes	yes
	Mmu__ENSMICT00000051292.2	no	yes	yes	yes	yes
	Nle__ENSNLET00000013041.2	no	yes	yes	yes	yes
	Ppa__ENSPPAT00000034195.1	no	yes	yes	yes	yes
	Ggo__ENSGGOT00000012135.3	no	yes	yes	yes	yes
	Pab__ENSPPYT00000012705.2	no	no	yes	yes	yes
		signal peptide	PF01471.17	PF00413.23	PF00045.18
MMP-25	Ptr__ENSPTRT00000014165.7	yes	yes	yes	yes
	Nle__ENSNLET00000012247.2	yes	yes	yes	yes
	Pab__ENSPPYT00000008282.2	yes	yes	yes	yes
	Mmu__ENSMICT00000030392.2	yes	yes	yes	yes
	Cja__ENSCJAG00000015476.2	no	yes	yes	yes
	Rro__XP_030781408.1	yes	yes	yes	yes
	Pan__ENSPANT00000011896.3	yes	yes	yes	yes
	Tge__ENSTGET00000038215.1	yes	yes	yes	yes
	Hsa__ENSG00000008516.16	yes	yes	yes	yes
	Pan__ENSPANT00000033891.1	no	no	yes	yes
	Nle__ENSNLET00000039668.1	no	no	yes	yes
	Ppa__ENSPPAT00000043188.1	no	no	yes	yes
	Ggo__ENSGGOT00000016378.3	no	no	yes	yes
		signal peptide	PF00413.23
MMP-26	Mmu__ENSMICT00000014298.3	yes	yes
	Cja__ENSCJAG00000015680.2	no	yes
	Rro__XP_010381719.1	yes	yes
	Pan__ENSPANT00000001414.2	yes	yes
	Tge__ENSTGET00000033975.1	yes	yes
	Pab__ENSPPYT00000004288.1	yes	yes
	Ptr__ENSPTRT00000006170.3	yes	yes
	Ggo__ENSGGOT00000011304.3	yes	yes
	Hsa__ENSG00000167346.7	yes	yes
	Ppa__ENSPPAT00000027794.1	yes	yes
		signal peptide	PF01471.17	PF00413.23	PF00045.18
MMP-27	Mmu__ENSMICT00000031369.2	yes	yes	yes	yes
	Cja__ENSCJAG00000003769.2	yes	yes	yes	yes
	Rro__XP_010377362.1	yes	yes	yes	yes
	Tge__ENSTGET00000019675.1	yes	yes	yes	yes
	Pan__ENSPANT00000045145.1	yes	yes	yes	yes
	Nle__ENSNLET00000009154.2	yes	yes	yes	yes
	Hsa__ENSG00000137675.4	yes	yes	yes	yes
	Ggo__ENSGGOT00000008755.3	yes	yes	yes	yes
	Ppa__ENSPPAT00000036552.1	yes	yes	yes	yes
	Ptr__ENSPTRT00000007864.3	yes	yes	yes	yes
		signal peptide	PF01471.17	PF00413.23	PF00045.18
MMP-28	Nle__ENSNLET00000017936.2	yes	yes	yes	yes
	Pab__ENSPPYT00000009583.2	yes	yes	yes	yes
	Ptr__ENSPTRT00000045218.3	yes	yes	yes	yes
	Hsa__ENSG00000271447.5	yes	yes	yes	yes
	Ggo__ENSGGOT00000015671.3	yes	yes	yes	yes
	Ppa__ENSPPAT00000034870.1	yes	yes	yes	yes
	Mmu__ENSMICT00000017052.3	no	no	yes	yes
	Cja__ENSCJAG00000014956.2	yes	yes	yes	yes
	Tge__ENSTGET00000024535.1	yes	yes	yes	yes
	Pan__ENSPANT00000045202.1	yes	yes	yes	yes
	Pan__ENSPANT00000020807.2	yes	yes	yes	yes
	Rro__XP_030780111.1	yes	yes	yes	yes
	Rro__XP_010383494.1	yes	yes	yes	yes
Human genes are in red. Signal peptide or Pfam domain which is lack in a cetain peptide is shaed in red.
